# Supplementary material for: The Relationship between Physical Activity and Long COVID: A Cross-Sectional Study
Source: MDPI journal article supplement (doi:10.3390/ijerph19095093), 2022-04-22
Supplement: s1 [file s1]

## Supplementary material

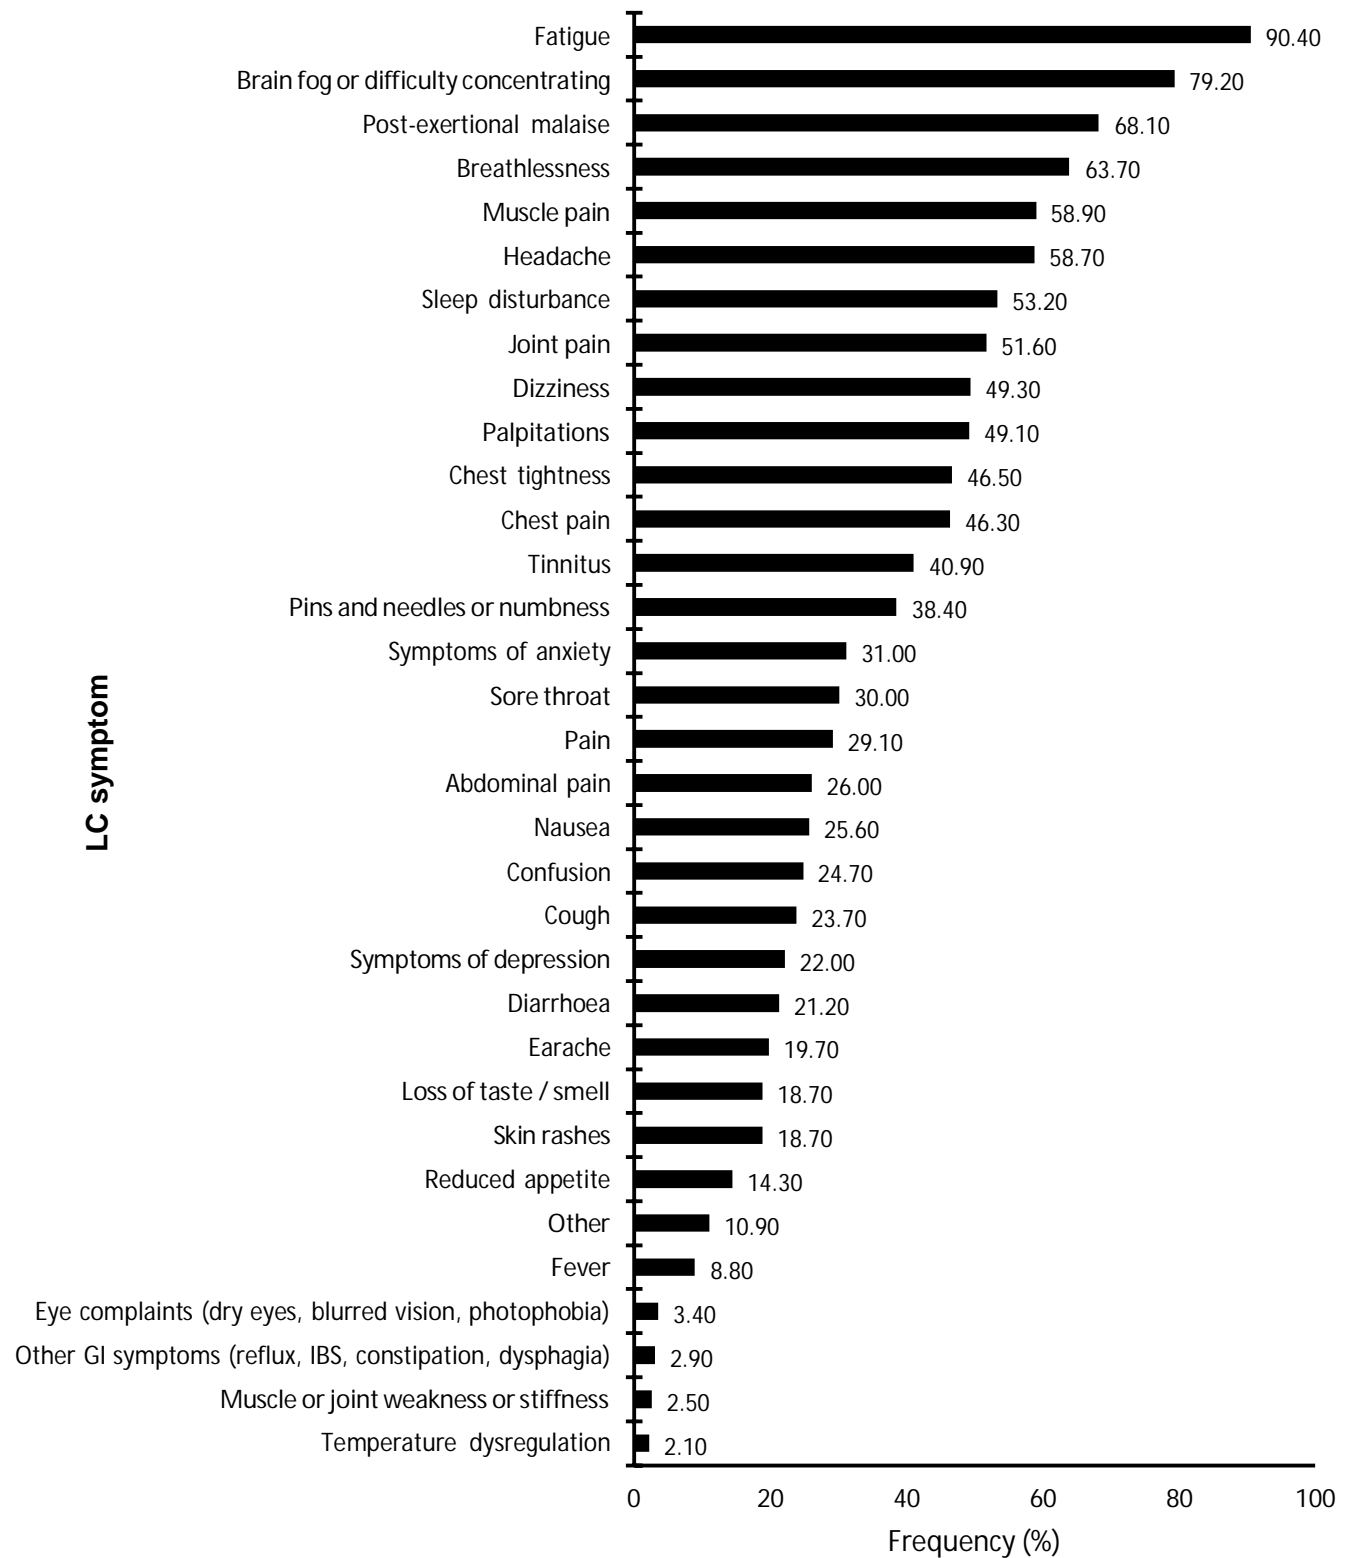

**Figure S1. Frequency (%) of Long Covid (LC) symptoms in the last 7 days. Other includes all symptoms with a frequency of <2%.**

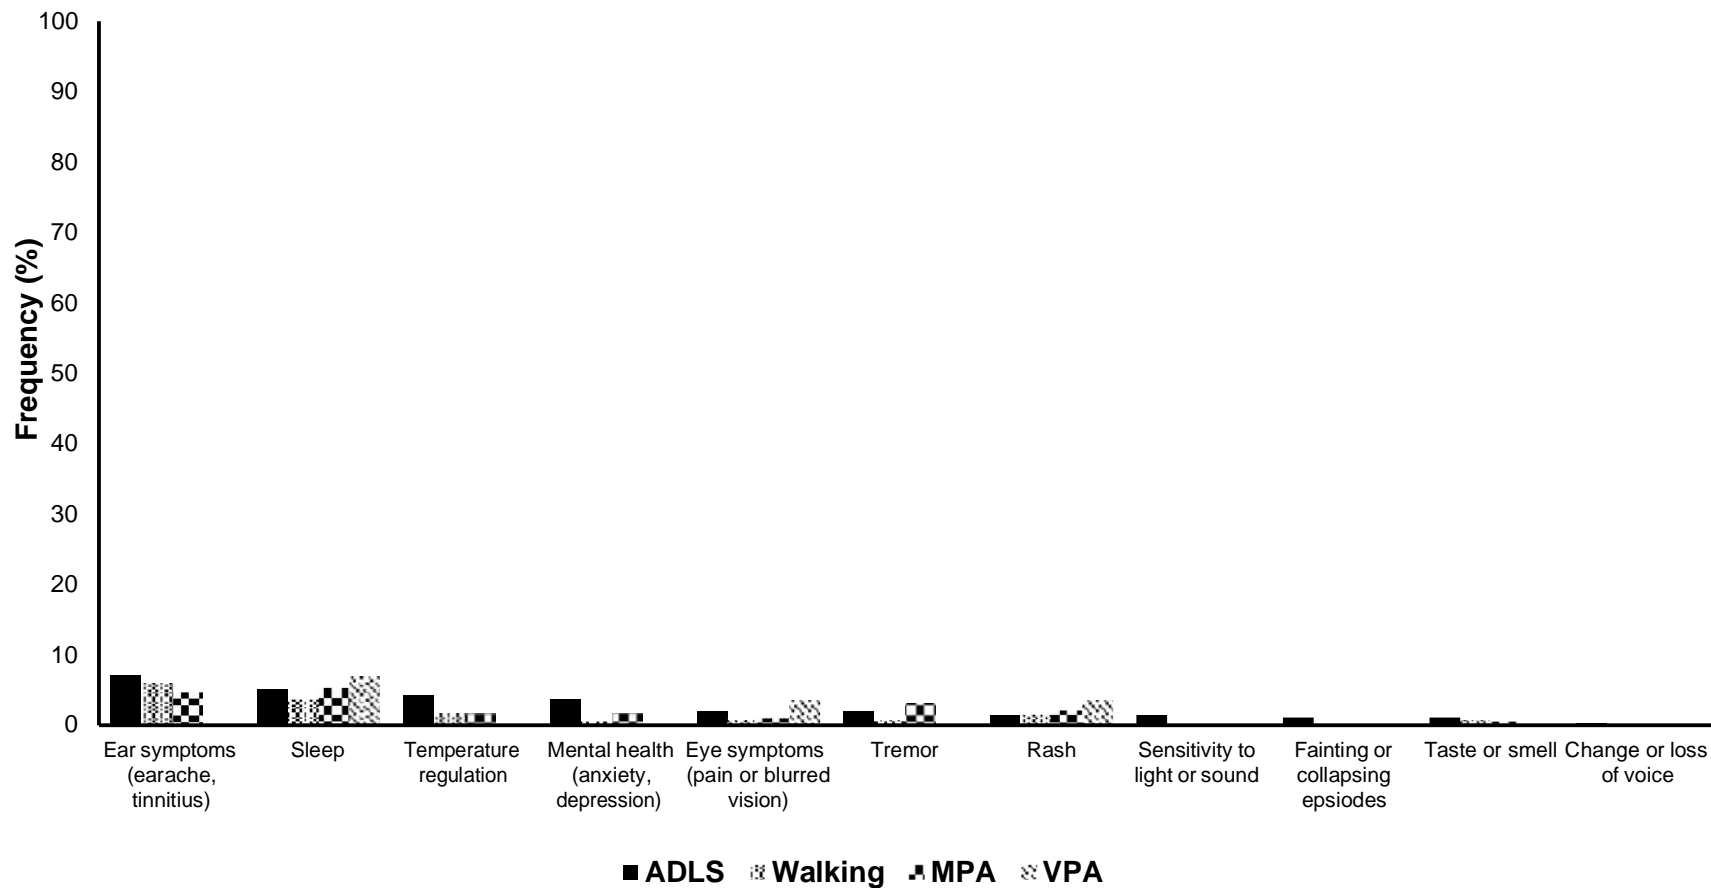

**Figure S2. The frequency (%) of the remaining LC symptoms that are worsened by activities of daily living (ADL, n=353), brisk walking (n=133), moderate physical activity (MPA, n=189) and vigorous physical activity (VPA, n=29).**

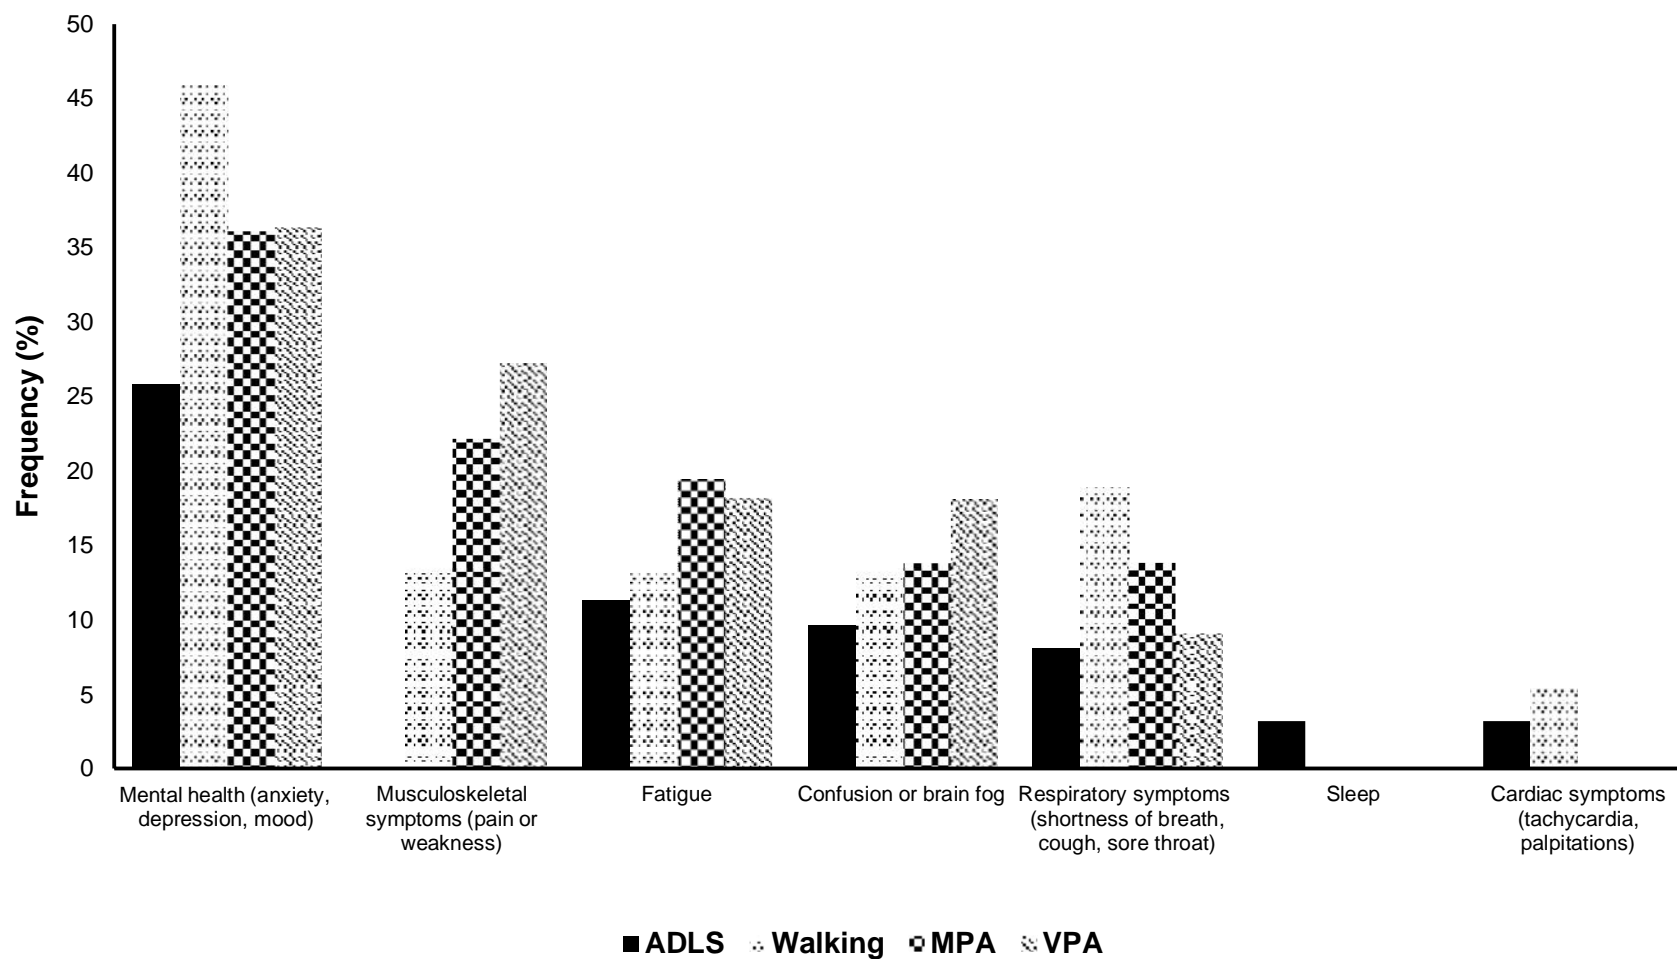

**Figure S3a.** The frequency (%) of LC symptoms that are improved by activities of daily living (ADL,  $n=62$ ), brisk walking ( $n=37$ ), moderate physical activity (MPA,  $n=36$ ) and vigorous physical activity (VPA,  $n=11$ ).

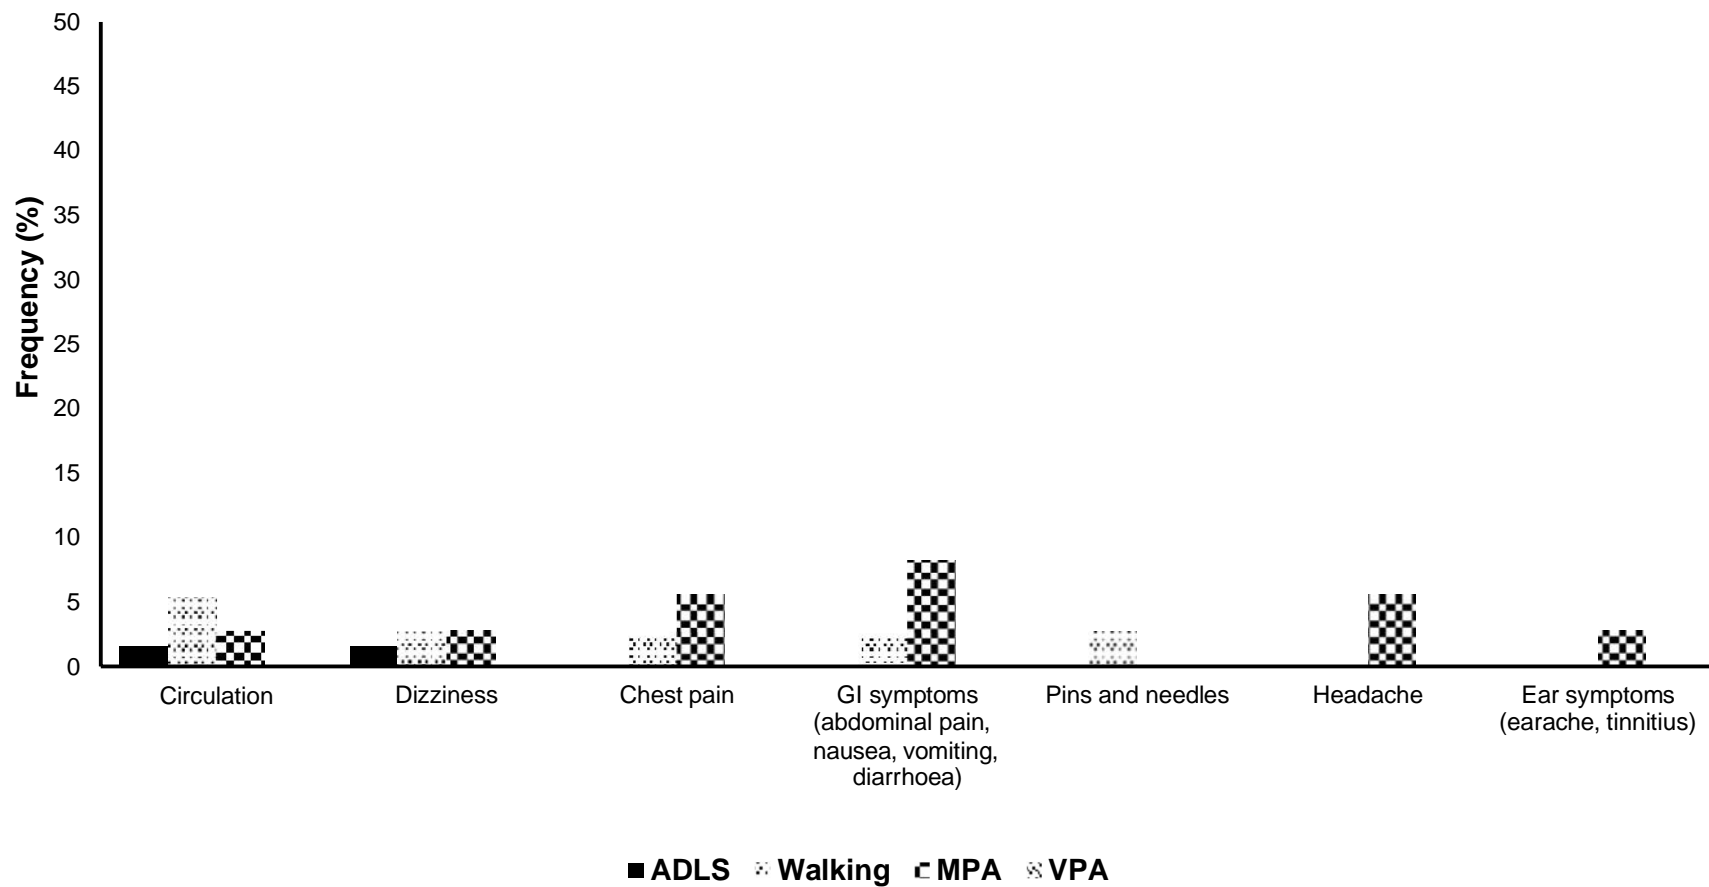

**Figure S3b.** The frequency (%) of LC symptoms that are improved by activities of daily living (ADL, n=62), brisk walking (n=37), moderate physical activity (MPA, n=36) and vigorous physical activity (VPA, n=11).

**Table S1. Participant characteristics for each effect group of physical activity (PA) on Long Covid symptoms (LC) symptoms.**

| Characteristic                                         | ADLs (n=468)        |                           |                           |                  |
|--------------------------------------------------------|---------------------|---------------------------|---------------------------|------------------|
|                                                        | Worsened (n=291)    | Mixed <sup>†</sup> (n=62) | No effect (n=115)         |                  |
| Age (years), mean (SD)                                 | 44.87 (9.76)        | 46.27 (11.57)             | 47.52 (9.72)              |                  |
| Number of LC symptoms in the last 7 days, median (IQR) | 12.00 (9.00, 15.00) | 10.00 (8.00, 15.00)       | 8.00 (5.00,11.00)         |                  |
| Gender (female), n (%)                                 | 273 (93.81)         | 52 (83.87)                | 93 (80.87)                |                  |
| Time since COVID-19 symptom onset (months), n (%)      |                     |                           |                           |                  |
| 0-6                                                    | 80 (27.97)          | 21 (34.43)                | 29 (25.44)                |                  |
| 6-12                                                   | 57 (19.93)          | 13 (21.31)                | 18 (15.80)                |                  |
| 12-18                                                  | 286 (52.10)         | 27 (44.26)                | 67 (58.77)                |                  |
| Met UK PA guidelines pre-COVID-19, n (%)               | 244 (83.85)         | 50 (80.64)                | 98 (85.22)                |                  |
| Met UK PA guidelines post-COVID-19, n (%)              | 17 (5.84)           | 9 (14.52)                 | 13 (11.30)                |                  |
|                                                        |                     |                           |                           |                  |
| Brisk walking (n=169)                                  |                     |                           |                           |                  |
| Characteristic                                         | Worsened (n=98)     | Improved (n=2)            | Mixed <sup>†</sup> (n=35) | No effect (n=34) |
| Age (years), mean (SD)                                 | 44.31 (8.62)        | 48.25 (12.37)             | 44.99 (11.35)             | 44.56 (13.11)    |

|                                                               |                         |                       |                                 |                         |
|---------------------------------------------------------------|-------------------------|-----------------------|---------------------------------|-------------------------|
| <b>Number of LC symptoms in the last 7 days, median (IQR)</b> | 11.00 (8.00, 14.00)     | 10.00 (8.00, 12.00)   | 10.00 (7.00, 14.00)             | 7.00 (5.00 10.25)       |
| <b>Gender (female), n (%)</b>                                 | 89 (90.82)              | 1 (50.00)             | 27 (77.14)                      | 23 (67.64)              |
| <b>Time since COVID-19 symptom onset (months), n (%)</b>      |                         |                       |                                 |                         |
| 0-6                                                           | 24 (25.00)              | 0 (0.00)              | 9 (26.47)                       | 9 (29.03)               |
| 6-12                                                          | 19 (19.79)              | 1 (50.00)             | 8 (23.53)                       | 5 (16.13)               |
| 12-18                                                         | 53 (55.21)              | 1 (50.00)             | 17 (50.00)                      | 17 (54.84)              |
| <b>Met UK PA guidelines pre-COVID-19, n (%)</b>               | 83 (84.69)              | 1 (50.00)             | 28 (80.00)                      | 27 (79.41)              |
| <b>Met UK PA guidelines post-COVID-19, n (%)</b>              | 14 (14.29)              | 1 (50.00)             | 7 (22.86)                       | 8 (23.53)               |
| <b>MPA (n=223)</b>                                            |                         |                       |                                 |                         |
| <b>Characteristic</b>                                         | <b>Worsened (n=156)</b> | <b>Improved (n=3)</b> | <b>Mixed<sup>†</sup> (n=33)</b> | <b>No effect (n=31)</b> |
| <b>Age (years), mean (SD)</b>                                 | 45.71 (9.39)            | 52.30 (9.91)          | 49.41 (9.03)                    | 48.81 (13.73)           |
| <b>Number of LC symptoms in the last 7 days, median (IQR)</b> | 11.50 (8.00, 15.00)     | 8.00 (4.50, 9.00)     | 9.00 (7.00, 12.00)              | 6.00 (5.00, 8.00)       |

|                                                          |             |            |            |            |
|----------------------------------------------------------|-------------|------------|------------|------------|
| <b>Gender (female), n (%)</b>                            | 147 (94.23) | 0 (0.00)   | 28 (84.85) | 25 (80.65) |
| <b>Time since COVID-19 symptom onset (months), n (%)</b> |             |            |            |            |
| 0-6                                                      | 54 (35.53)  | 0 (0.00)   | 8 (24.24)  | 11 (36.67) |
| 6-12                                                     | 25 (16.45)  | 0 (0.00)   | 5 (15.15)  | 6 (20.00)  |
| 12-18                                                    | 73 (48.03)  | 3 (100.00) | 20 (60.61) | 13 (43.33) |
| <b>Met UK PA guidelines pre-COVID-19, n (%)</b>          | 134 (85.90) | 3 (100.00) | 32 (96.97) | 24 (77.42) |
| <b>Met UK PA guidelines post-COVID-19, n (%)</b>         | 22 (14.10)  | 1 (33.33)  | 10 (30.31) | 5 (16.13)  |

---

| <b>Characteristic</b>                                         | <b>VPA (n=468)</b>     |                                 |                        |
|---------------------------------------------------------------|------------------------|---------------------------------|------------------------|
|                                                               | <b>Worsened (n=18)</b> | <b>Mixed<sup>t</sup> (n=11)</b> | <b>No effect (n=4)</b> |
| <b>Age (years), mean (SD)</b>                                 | 46.04 (8.30)           | 50.26 (11.38)                   | 49.67 (15.68)          |
| <b>Number of LC symptoms in the last 7 days, median (IQR)</b> | 12.00 (7.75, 16.75)    | 9.00 (5.00, 15.00)              | 6.50 (3.75, 7.00)      |
| <b>Gender (female), n (%)</b>                                 | 17 (94.44)             | 10 (90.91)                      | 2 (50.00)              |
| <b>Time since COVID-19 symptom onset (months), n (%)</b>      |                        |                                 |                        |
| 0-6                                                           | 7 (38.89)              | 4 (36.36)                       | 1 (25.00)              |
| 6-12                                                          | 2 (11.11)              | 2 (18.18)                       | 1 (25.00)              |

|                                                       |            |            |           |
|-------------------------------------------------------|------------|------------|-----------|
| 12-18                                                 | 9 (50.00)  | 5 (45.45)  | 2 (50.00) |
| <b>Met UK PA guidelines<br/>pre-COVID-19, n (%)</b>   | 17 (94.44) | 10 (90.91) | 2 (50.00) |
| <b>Met UK PA guidelines-<br/>post-COVID-19, n (%)</b> | 9 (50.00)  | 10 (90.91) | 0 (0.00)  |

---

*ADL's; activities of daily living, IQR; interquartile range, n; number, MPA; moderate physical activity, PA; physical activity, SD; standard deviation, UK; United Kingdom, VPA; vigorous physical activity. <sup>†</sup>mixed denotes that PA can both improve and worsen participants LC symptoms.*
